# Supplementary material
Source: PubMed Central journal article supplement (PMC380996)
Supplement: 7600084s2.pdf [file 7600084s2.pdf]

## SUPPLEMENTARY TABLES

**Table 1: Peptides used for antibody generation**

| name   | Used for | status   | residues used for immunization                                                 | used in Figure |
|--------|----------|----------|--------------------------------------------------------------------------------|----------------|
| Sra-1A | IF       | serum    | GST-Sra-1 aa 1-405                                                             | 1, 5           |
| Sra-1B | WB, IP   | affipure | 519-CDWETGHEPFNDPALRGEKDPKSGFDIKVPRRAVGPSS-556                                 | 2,4,6,S1       |
| Nap1-A | WB       | serum    | 65-(C)-PAVETRNNNQLAQLQKEKSEILKNL-90 and 641-VNKKSkkQTGKKGEPEREKPGVESMRKNRL-670 | 4,6,S1         |
| Nap1-B | WB       | affipure | 641-VNKKSkkQTGKKGEPEREKPGVESMRKNRL-670                                         | 2,S1           |
| Nap1-C | IF, IP   | serum    | 1117-(C)-HAVYKQSVTSSA-1128                                                     | 1,2, 5         |
| WAVE1  | WB       | affipure | 286-(C)-GAGDAKPTPTCISSATGLIENRPQ-309                                           | S2             |
| WAVE3  | WB       | affipure | 214-(C)-LRPDNRLSQSVHHGASSEGLSPDTR-239                                          | S2             |

**Table 2: Nucleotide sequences of oligos fused into pSUPER retro for RNAi**

| Target gene | sequence                                                        | length | vector | specificity     |
|-------------|-----------------------------------------------------------------|--------|--------|-----------------|
| Nap1 fwd    | GATCCCCCAGATTGCTGCAGCTTTGTTCAAGAGACAAAGCTGCAGCAATCTGGTTTTGGAAA  | 64     | pSup   | human and mouse |
| Nap1 rev    | AGCTTTTCCAAAAACAGATTGCTGCAGCTTTGTTCTTTGAACAAAGCTGCAGCAATCTGGGGG | 64     | PSup   |                 |
| Sra-1 fwd   | GATCCCCGTACTCCAACAAGGACTGCTTCAAGAGACAGCTCCTTGTGGAGTACTTTTTGGAAA | 64     | PSup   | human and mouse |
| Sra-1 rev   | AGCTTTTCCAAAAAGTACTCCAACAAGGACTGCTCTTTGAAGCAGTCCCTGTTGGAGTACGGG | 64     | PSup   |                 |
| PIR121 fwd  | GATCCCCCTTCGAGGACAGGAATGCATTCAGAGATGCATTCTCTCGAAGTTTTGGAAA      | 64     | PSup   | mouse           |
| PIR121 rev  | AGCTTTTCCAAAACTTCGAGGACAGGAATGCATCTCTTGAATGCATTCTCTCGAAGGGG     | 64     | pSup   |                 |

**Table 3 A: Values from lamellipodia quantification in Figure 4 and 6**

|                      | # lam               | # amb. | # w/o | Σ           | % Lam                     | % amb. | % w/o  | ± lam                 | ± amb | ± w/o |
|----------------------|---------------------|--------|-------|-------------|---------------------------|--------|--------|-----------------------|-------|-------|
|                      | Total cells counted |        |       |             | Mean of cells counted (%) |        |        | Stanard error of mean |       |       |
| <b>B16-F1 + AIF4</b> |                     |        |       | <b>1717</b> |                           |        |        |                       |       |       |
| Control              | 482                 | 49     | 59    | 590         | 80,373                    | 9,222  | 10,345 | 7,294                 | 2,723 | 4,847 |
| Sra-1/PIR121         | 144                 | 88     | 324   | 556         | 25,087                    | 15,832 | 58,361 | 5,731                 | 3,852 | 8,525 |
| Nap1                 | 68                  | 55     | 449   | 572         | 11,459                    | 9,794  | 76,696 | 4,848                 | 0,812 | 4,588 |
| <b>VA-13 + EGF</b>   |                     |        |       | <b>4507</b> |                           |        |        |                       |       |       |
| Control              | 1248                | 48     | 231   | 1527        | 81,97                     | 3,15   | 14,89  | 1,74                  | 0,32  | 1,81  |
| Sra-1                | 440                 | 82     | 1049  | 1571        | 27,26                     | 5,07   | 67,68  | 2,47                  | 0,7   | 3,11  |
| Nap1                 | 179                 | 47     | 1183  | 1409        | 12,26                     | 3,60   | 84,14  | 1,75                  | 1,28  | 1,89  |
| <b>VA-13 + PDGF</b>  |                     |        |       | <b>3794</b> |                           |        |        |                       |       |       |
| Control              | 1297                | 45     | 189   | 1531        | 84,85                     | 3,32   | 11,82  | 0,80                  | 1,23  | 1,97  |
| Sra-1                | 495                 | 67     | 725   | 1287        | 36,52                     | 6,84   | 56,65  | 2,63                  | 2,19  | 0,65  |
| Nap1                 | 138                 | 39     | 799   | 976         | 13,33                     | 4,38   | 82,29  | 1,19                  | 0,67  | 0,62  |

**Table 3B: Values from lamellipodia quantification in Figure 5**

|                     | # lam | # w/o | Σ   | % Lam | % w/o | ± lam | ± w/o |
|---------------------|-------|-------|-----|-------|-------|-------|-------|
| <b>B16-F1 + AIF</b> |       |       | 689 |       |       |       |       |
| Nap1                | 44    | 285   | 329 | 13,42 | 86,58 | 0,68  | 0,68  |
| Nap1 + GFP-WAVE2    | 30    | 330   | 360 | 8,31  | 91,69 | 1,70  | 1,70  |

**Table 3** Values are given as total numbers (#) or means of the percentage (%) of counted cells from three independent quantifications and standard errors of mean (±) displaying the following morphologies: **lam**, cells with lamellipodia or membrane ruffles; **amb**, cells with ambiguous morphology; **w/o**, cells without lamellipodia. (Σ: sum of all cells counted).

The scale bar represents 10 μm
