# Supplementary material
Source: PubMed Central journal article supplement (PMC380996)
Supplement: 7600084s3.pdf [file 7600084s3.pdf]

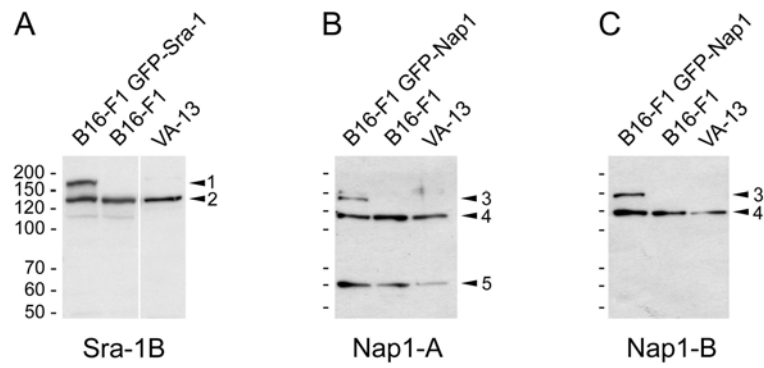

**Figure S1** Characterization of polyclonal antibodies used for Western blot analyses.

Staining characteristics of affinity-purified antibodies raised against Sra-1 (**A**) and Nap1 (**C**) and of an antiserum against Nap1 (**B**) are shown for extracts derived from B16-F1 and VA-13 cells or B16-F1 cells transfected with GFP-tagged Sra-1 and Nap1 as indicated. The specificity of the antibodies is demonstrated by recognition of the respective endogenous proteins (arrowhead 2 in **A** and 4 in **B**, **C**) as well as the GFP-tagged constructs (1 in **A** and 3 in **B**, **C**). The cross-reaction of the Nap1 antiserum (5 in **B**) was used as a loading control in some instances. Molecular weights (in kDa) in (**A**) are also valid for (**B**) and (**C**).
