# Supplementary material
Source: PubMed Central journal article supplement (PMC380996)
Supplement: 7600084s4.pdf [file 7600084s4.pdf]

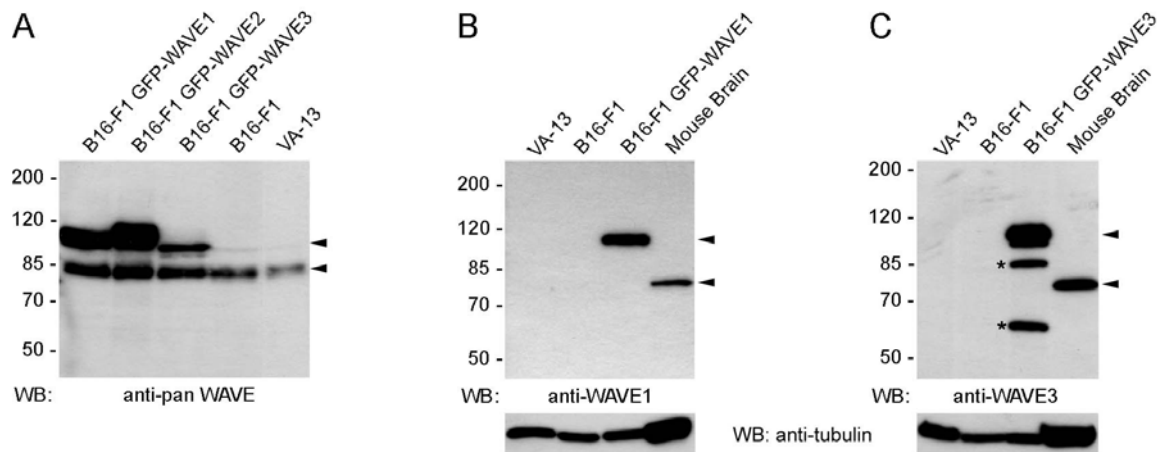

**Figure S2** B16-F1 murine melanoma cells and VA-13 human fibroblasts express WAVE2, but not WAVE1 and WAVE3.

The pan-WAVE antiserum used in Fig. 2 and 5 reacts with the three ectopically expressed GFP-tagged WAVE isoforms (**A**; upper arrowhead) and endogenous protein from both B16-F1 and VA-13 extracts (**B**, lower arrowhead), which was concluded to correspond to WAVE2, since WAVE1 and WAVE3-specific antisera (**B** and **C**, respectively) revealed that these isoforms are not expressed at detectable levels in both cell lines (**B**, **C**). Note detection by WAVE1- and WAVE3-specific antiserum, respectively, of both WAVE 1 (**B**) and WAVE3 (**C**) in mouse brain extracts (lower arrowheads) and interaction with the respective GFP-tagged proteins expressed in B16-F1 cells (**B**, **C**; upper arrowheads). Asterisks in (**E**) mark degradation products of over-expressed GFP-tagged WAVE3. Loading controls were performed by re-probing the membranes with the monoclonal anti  $\alpha$ -tubulin antibody YL1/2 (**B**, **C**; bottom panels).
