# Supplementary material
Source: PubMed Central journal article supplement (PMC380996)
Supplement: 7600084s5.pdf [file 7600084s5.pdf]

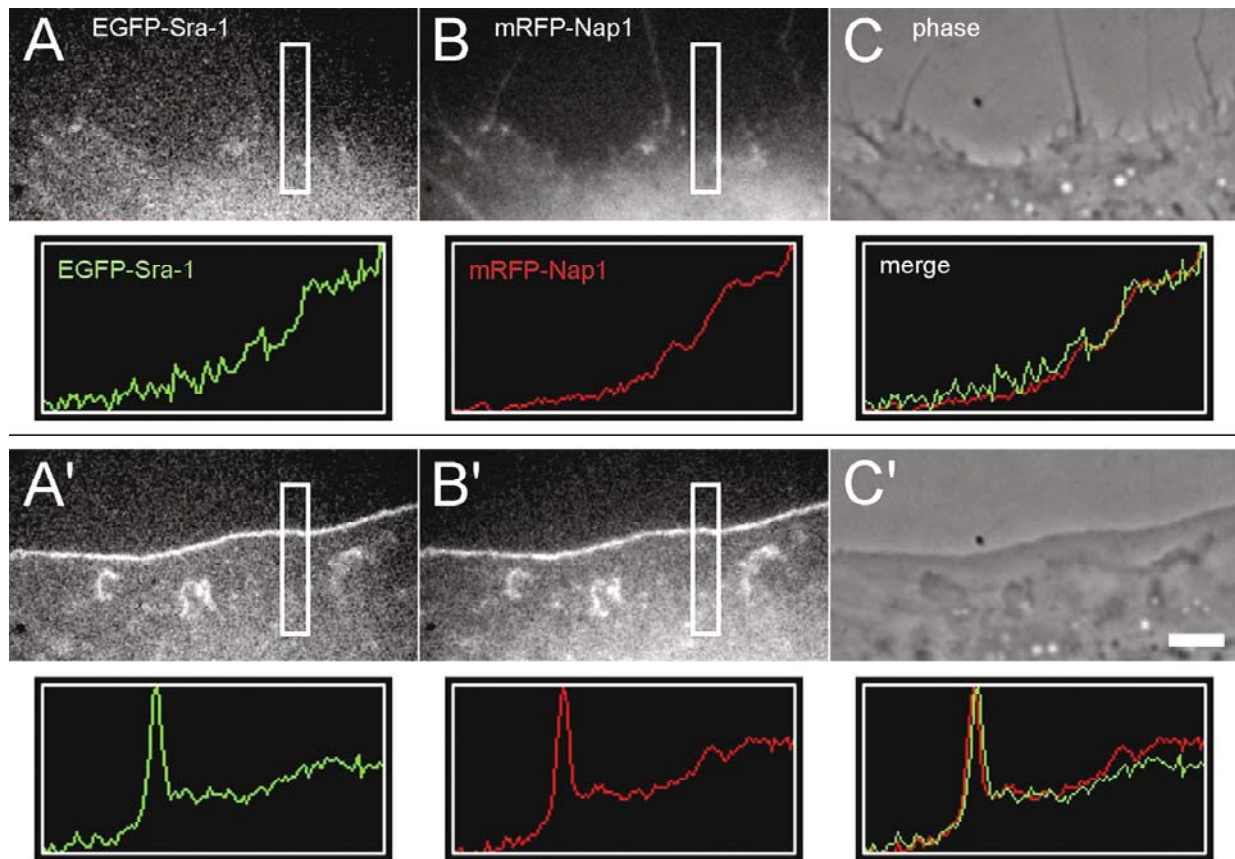

**Figure S3** Co-translocation of Sra-1 and Nap1 upon injection of L61-Rac1.

Representative example of a NIH 3T3 fibroblast expressing both EGFP-tagged Sra-1 and mRFP-Nap1, which was analysed by two-colour fluorescence and phase contrast video microscopy during microinjection of constitutively active L61Rac1 as indicated. Panels shown represent video frames taken 1.5 minutes before (A-C) or 12 minutes after injection (A'-C'). Both Sra-1 (A) and Nap1 (B) were not enriched at the cell periphery before injection due to the absence of significant lamellipodia (C), but were dramatically co-translocated (A', B') upon induction of lamellipodia formation (C') by injection of L61-Rac1. Line intensity scans obtained from regions as indicated by white rectangles (A'-B') were generated as described in Supplementary Methods. The intensity scans for both EGFP-Sra-1 and mRFP-Nap1 upon Rac injection showed a sharp peak which corresponds to the lamellipodium tip. Note that the slight shift of the mRFP-peak, which becomes apparent in the merged scan after Rac injection (bottom right panel) is due to consecutive imaging of EGFP-Sra-1 and mRFP-

Nap1, since – for technical reasons - image acquisition in the mRFP-channel was delayed by 6 sec as compared to the EGFP-channel leading to continuous leftward movement of the peaks due to continuous forward protrusion of the lamellipodium (see also Supplemental Movie 3).

The data demonstrate virtually identical degrees of Rac-triggered co-translocation of both proteins to the distal edge of the lamellipodium as compared to more proximal regions. The scale bar equals 5  $\mu\text{m}$ .
